# Supplementary material for: Incentive Contracts in Serial Stochastic Projects
Source: Atypon-hosted journal article supplement (doi:10.1287/msom.2015.0528), 2015-04-20
Supplement: msom.2015.0528-sm-online-supplement-upd.pdf [file msom.2015.0528-sm-online-supplement-upd.pdf]

## Online Supplement

### *Appendix A*

In Proposition A1, we show that the expected client's profit defined by (6) is concave for each value of  $g_i$  (holding all values of  $g_j$  constant for  $j \neq i$ ) such that the problem of finding equilibrium  $\hat{g}_i$  values can be decomposed into  $n$  subproblems if solved in a backward sequence  $n, n-1, n-2, \dots, 1$ . The latter result leads to the development of an efficient backward search procedure for finding the equilibrium values  $\hat{g}_i$ .

***Proposition A1.*** Given values of  $\beta_i \geq 0$ , the expected client's profit  $E[\Pi_C^{\mathbb{I}}(\beta_1, \dots, \beta_n)]$  defined by (6) is concave for  $g_i = \frac{\alpha}{\alpha + r_i}$  when  $g_j$  (for all  $j \neq i$ ) are fixed. Furthermore, the problem of finding unique equilibrium  $\hat{g}_i$  values that maximize (6) can be decomposed into  $n$  subproblems.

**Proof:** See Appendix C.

Using the results from Proposition A1, we can define a search procedure that we denote as Algorithm *SIP* (“Search for Incentive Payments”) to find the unique equilibrium values of  $g_i$ . The correctness of Algorithm *SIP* is implied by the proof of Proposition A1. While the algorithm is presented for finding equilibrium subcontractor payments when contract  $\mathbb{I}$  is used, it is immediately applicable for contract  $\mathbb{F}$  by setting  $\beta_i = 0$  for all  $i$ , and it can be easily modified to find equilibrium subcontractor payments for other related contracts as well.

**Algorithm SIP.**

- 1) Set  $j = n$ .
- 2) Use binary search on  $g_j$  to find the value  $\hat{g}_j$  that satisfies

$$\frac{\alpha k_j}{\alpha + \beta_j} \left[ \beta_j \left( 1 + \frac{1}{(g_j)^2} - 2g_j \right) + \alpha \left( \frac{2}{(g_j)^3} - \frac{1}{(g_j)^2} - 1 \right) \right] = \text{Constant}(j)$$

where

$$\text{Constant}(j) = \begin{cases} Q \prod_{h=j+1}^n (1 - \hat{g}_h) - \sum_{m=j+1}^n \frac{\alpha k_m}{\alpha + \beta_m} (1 - \hat{g}_m)^2 \left( \frac{1}{\hat{g}_m} + 1 \right) \left( \frac{\alpha}{\hat{g}_m} + \beta_m \right) \prod_{h=j+1}^{m-1} (1 - \hat{g}_h), & \text{for } j < n \\ Q, & \text{for } j = n. \end{cases}$$

- 3) Calculate  $\hat{r}_j = \frac{\alpha(1 - \hat{g}_j)}{\hat{g}_j}$  and  $\hat{p}_j$  using (4).

- 4) Set  $j = j-1$  and go to step 2, letting  $g_k = \hat{g}_k$  and  $p_k = \hat{p}_k$  for all  $k = j+1, \dots, n$ .

The equation used in step 2 to find  $\hat{g}_j$  is defined by setting

$$\frac{\partial E[\Pi_C^j(\beta_1, \dots, \beta_n)]}{\partial g_j} = 0; \text{ details are given in the proof of Proposition A1 in Appendix C.}$$

When searching for  $\hat{g}_j$  in step 2 of the algorithm, it should be noted that the term  $\text{Constant}(j)$  is defined by the values  $(\hat{g}_{j+1}, \dots, \hat{g}_n)$  that were calculated in the previous iterations (since we use a backward search method). Given values of  $\hat{g}_i$ , the equilibrium expected client's profit  $E[\Pi_C^{j*}(\beta_1, \dots, \beta_n)]$  can be found using (6); conversely, we can find values  $\hat{r}_i = \frac{\alpha(1 - \hat{g}_i)}{\hat{g}_i}$  and  $\hat{p}_i$  from (4) and the maximum expected client's profit using (5).

## Appendix B: Modified SIP Algorithm When Opportunity Costs $O_i > 0$

### B.1 Modifications for Contract $\mathbb{F}$

When opportunity costs are positive, the SIP Algorithm (described in Appendix A) can be modified for contract  $\mathbb{F}$  as follows:

- 1) Calculate the prices  $p_n^{SIP}, p_{n-1}^{SIP}, \dots, p_1^{SIP}$  from Algorithm SIP.
- 2) For  $j=1, \dots, n$ ,  $p_i^{\mathbb{F}} = \max\{p_i^{SIP}, \underline{p}_i(O_i)\}$ .

Recall that Algorithm SIP necessarily calculates the prices in reverse order:  $p_n^{SIP}, p_{n-1}^{SIP}, \dots, p_1^{SIP}$ . However, the second step in our procedure must be processed in the natural order  $p_1^{\mathbb{F}}, p_2^{\mathbb{F}}, \dots, p_n^{\mathbb{F}}$  since increasing subcontractor  $i$ 's price will also increase her work rate, which will result in a *decrease* in the minimum price  $\underline{p}_j(O_j)$  for all successors  $j > i$  (due to the structure of the profit function). Therefore, there is a “backwards pass” to determine the SIP prices, and then a “forward pass” to determine the adjusted prices.

### B.2. Modifications for Contract $\mathbb{I}$

In this section, for simplicity, we assume that  $K_i = 0$  for all  $i$ . Under contract  $\mathbb{I}$ , the price adjustments require a more involved procedure. Subcontractor  $i$ 's expected profit, given in Equation (1), evaluated at the equilibrium work rate  $r_i^*$  of Proposition 1, can be written as

$$E[\pi_i^{\mathbb{I}}(r_i^*, \beta_i)] = \left( \frac{k_i r_i^* (r_i^{*2} + 2r_i^* \alpha)}{(\alpha + \beta_i)(\alpha + r_i^*)} - \frac{k_i r_i^{*2}}{\alpha + r_i^*} \right) \prod_{j=1}^{i-1} \frac{r_j^*}{\alpha + r_j^*}.$$

Next, we use the substitution  $g_i = \frac{\alpha}{\alpha + r_i^*}$ , that results in the profit expression

$$E[\pi_i^{\mathbb{I}}(g_i, \beta_i)] = \alpha k_i \left( \frac{\alpha}{(\alpha + \beta_i)} \left( \frac{1}{g_i^2} - 1 - \frac{1}{g_i} + g_i \right) - \left( \frac{1}{g_i} - 2 + g_i \right) \right) \prod_{j=1}^{i-1} (1 - g_j).$$

For a given  $\beta_i$ , Algorithm SIP gives  $\hat{g}_i(\beta_i)$ , which maximizes the client's profit; suppressing the dependence on  $\beta_i$  for clarity (i.e.,  $\hat{g}_i = \hat{g}_i(\beta_i)$ ), the subcontractor's (maximized) profit is now only a function of  $\beta_i$ :  $E[\pi_i^{\mathbb{I}}(\beta_i)]$ . The derivative of this profit with respect to  $\beta_i$  can be written as

$$\frac{\partial E[\pi_i^{\mathbb{I}}(\beta_i)]}{\partial \beta_i} = \frac{\alpha k_i}{(\alpha + \beta_i) \hat{g}_i^2} \left[ (1 - \hat{g}_i) \left( \frac{\beta_i \hat{g}_i (1 + \hat{g}_i) - 2\alpha}{\hat{g}_i} \right) \frac{\partial \hat{g}_i}{\partial \beta_i} - \frac{\alpha}{(\alpha + \beta_i)} (1 + \hat{g}_i) (1 - \hat{g}_i)^2 \right] \prod_{j=1}^{i-1} (1 - g_j)$$

The one unknown quantity in this expression is the partial derivative  $\frac{\partial \hat{g}_i}{\partial \beta_i}$ . However,

recalling step 2 of SIP Algorithm, we see that  $\hat{g}_i$  is determined by setting

$$\frac{\alpha k_j}{\alpha + \beta_j} \left[ \beta_j \left( 1 + \frac{1}{(g_j)^2} - 2g_j \right) + \alpha \left( \frac{2}{(g_j)^3} - \frac{1}{(g_j)^2} - 1 \right) \right]$$

equal to a constant; the derivative of this expression with respect to  $\beta_i$  can be shown to be negative, which implies that  $\frac{\partial \hat{g}_i}{\partial \beta_i} < 0$ . In addition, since  $\hat{g}_i \in (0,1)$  for all  $\beta_i \geq 0$ , the derivative  $\frac{\partial \hat{g}_i}{\partial \beta_i} > -1$  for all  $\beta_i \geq 0$ , except possibly on a set of  $\beta_i$  with measure strictly less than 1; in other words,  $\hat{g}_i$  decreases more slowly than  $\beta_i$  increases. Therefore, for a large enough  $\beta_i$ , the derivative  $\frac{\partial E[\pi_i^{\mathbb{I}}(\beta_i)]}{\partial \beta_i}$  is negative.

When opportunity costs are positive, the SIP Algorithm (described in Appendix A) can be modified for contract  $\mathbb{I}$  as follows:

In the natural order  $i = 1, \dots, n$ , we evaluate the subcontractor's expected profit under the SIP prices when  $\beta_i = 0$ .

1) If  $E[\pi_i^{\mathbb{I}}(0)] < O_i$ , then apply the adjustment analysis from Contract  $\mathbb{F}$  to raise subcontractor  $i$ 's profit to  $O_i$  by determining the adjusted price  $p_i^{\mathbb{F}} = \max\{p_i^{\text{SIP}}, \underline{p}_i(O_i)\}$ .

2) Alternatively, if  $E[\pi_i^{\mathbb{I}}(0)] > O_i$ ,  $\beta_i$  is increased to lower subcontractor  $i$ 's profit to  $O_i$ .

### Appendix C

#### **Proof of Proposition 1.**

Given that  $E[\pi_i^{\mathbb{I}}] = \left( \frac{p_i r_i}{\alpha + \beta_i + r_i} - \frac{K_i + k_i r_i^2}{\alpha + r_i} \right) \prod_{j=1}^{i-1} \frac{r_j}{\alpha + r_j}$ ,

setting the first order condition (FOC) to zero and holding all values of  $r_j$  ( $l \neq i$ ) constant, we get

$$\frac{\partial E[\pi_i^1]}{\partial r_i} = \left[ \frac{p_i(\alpha + \beta_i)}{(\alpha + \beta_i + r_i)^2} - \frac{k_i(r_i^2 + 2\alpha r_i) - K_i}{(\alpha + r_i)^2} \right] \prod_{j=1}^{i-1} \frac{r_j}{\alpha + r_j} = 0, \text{ implying that the equilibrium}$$

work rate for subcontractor  $i$  is equal to

$$r_i^* = \sqrt{\alpha^2 + \frac{p_i(\alpha + \beta_i)(\alpha + r_i^*)^2}{k_i} + \frac{K_i}{k_i}} - \alpha. \quad (C0)$$

The second order condition (SOC) confirms that this maximizes  $E[\pi_i^1]$ ; that is,

$$\frac{\partial^2 E[\pi_i^1]}{\partial r_i^2} = \left[ -\frac{2(\alpha + \beta_i)p_i}{(\alpha + \beta_i + r_i)^3} - \frac{2\alpha^2 k_i + K_i}{(\alpha + r_i)^3} \right] \prod_{j=1}^{i-1} \frac{r_j}{\alpha + r_j} < 0.$$

To prove uniqueness, rewrite (C0) as

$$\frac{p_i(\alpha + \beta_i)(\alpha + r_i)^2}{k_i(\alpha + \beta_i + r_i)^2} + \frac{K_i}{k_i} = (r_i)^2 + 2\alpha r_i. \quad (C1)$$

Denote the left-hand-side of (C1) as LHS, and similarly define the RHS. From (C1) the  $LHS_{(r_i=0)} > RHS_{(r_i=0)}$  and  $\lim_{r_i \rightarrow \infty} LHS < \lim_{r_i \rightarrow \infty} RHS$ . Moreover, the derivative of  $LHS_{(r_i)}$  is positive and strictly decreasing in  $r_i$  while the derivative of  $RHS_{(r_i)}$  is positive and strictly increasing in  $r_i$ . Consequently, for a given  $\beta_i$  and  $p_i$  the positive solution  $r_i^*$  that satisfies (C0) is unique.

*Q.E.D.*

**Proof of Proposition 2.**

When subcontractor  $i$  selects its optimal work rate as defined in (2), we can rewrite  $p_i$  as a function of  $r_i^*$ :

$$p_i = \frac{\left[ (r_i^*)^2 + 2\alpha r_i^* \right] (\alpha + \beta_i + r_i^*)^2 k_i}{(\alpha + \beta_i) (\alpha + r_i^*)^2}. \quad (\text{C2})$$

Substituting this expression for  $p_i$  into (1) we have

$$E[\pi_i^{\text{II}}] = \left[ \frac{k_i (r_i^*)^2 \left( (r_i^*)^2 + 2\alpha r_i^* + \alpha^2 + \alpha\beta \right)}{(\alpha + \beta_i) (\alpha + r_i^*)^2} \right] \prod_{j=1}^{i-1} \frac{r_j}{\alpha + r_j} > 0. \quad (\text{C3})$$

*Q.E.D.*

**Proof of Corollary 1**

Replace all  $r_i^*$  with  $\alpha + \beta_i$  in the expression for  $\frac{\partial r_i^*}{\partial \beta_i}$ , and we have

$$\frac{\alpha^2}{(2\alpha + \beta_i)^2} + \frac{p_i}{4k_i} \frac{1}{(\alpha + \beta_i)} = 1.$$

Define  $f(\beta_i) = \frac{\alpha^2}{(2\alpha + \beta_i)^2} + \frac{p_i}{4k_i} \frac{1}{(\alpha + \beta_i)}$ , which is strictly decreasing in  $\beta_i$ . Note that  $\beta_i$  is defined for  $\beta_i \geq 0$ . If  $f(0) < 1$ , then  $p_i < 3\alpha k_i$ . Hence, there does not exist a value of  $\beta_i$  where  $r_i^* = \alpha + \beta_i$ . Alternatively, if  $p_i \geq 3\alpha k_i$ , then  $f(0) \geq 1$ . If  $f(0) = 1$ , since  $f(\beta_i)$  is strictly decreasing,  $\hat{\beta}_i = 0$  is the only value of  $\beta_i$  that allows  $r_i^* = \alpha + \beta_i$ . If  $f(0) > 1$ , we need to make sure that there exists a value of  $\beta_i > 0$  where  $f(\beta_i) \leq 1$ ; this is easily seen by taking the limit

$$\lim_{\beta_i \rightarrow \infty} f(\beta_i) = 0.$$

Therefore, there exists a unique  $\hat{\beta}_i > 0$  where  $r_i^* = \alpha + \hat{\beta}_i$ .

*Q.E.D.*

**Proof of Corollary 2.**

We provide this proof by contradiction. Taking the derivative of (C3) with respect to  $\beta_i$ , we have

$$\frac{\partial E[\pi_i^{I^*}]}{\partial \beta_i} = 2k_i r_i^* \left[ \frac{\left[ (r_i^*)^3 + 3(r_i^*)^2 + 3\alpha^2 r_i^* + \alpha^2(\alpha + \beta_i) \right] (\alpha + \beta_i) \frac{\partial r_i^*}{\partial \beta_i} - \left( \alpha + \frac{r_i^*}{2} \right) (\alpha + r_i^*) (r_i^*)^2}{(\alpha + \beta_i)^2 (\alpha + r_i^*)^3} \right] \prod_{j=1}^{i-1} \frac{r_j}{\alpha + r_j},$$

which implies

$$\frac{\partial E[\pi_i^{I^*}]}{\partial \beta_i} > 0 \quad \text{iff} \quad \frac{\partial r_i^*}{\partial \beta_i} > \frac{\left( \alpha + \frac{r_i^*}{2} \right) (\alpha + r_i^*) (r_i^*)^2}{\left[ (r_i^*)^3 + 3(r_i^*)^2 + 3\alpha^2 r_i^* + \alpha^2(\alpha + \beta_i) \right] (\alpha + \beta_i)}. \quad (C4)$$

Given that  $\frac{\partial r_i^*}{\partial \beta_i} = \frac{(\alpha + r_i^*) \left[ \frac{r_i^* - (\alpha + \beta_i)}{\alpha + \beta_i + r_i^*} \right]}{2(\alpha + \beta_i) \left[ \frac{\alpha^2}{r_i^* (2\alpha + r_i^*)} + \frac{\alpha + r_i^*}{\alpha + \beta_i + r_i^*} \right]}$ ,

we can substitute  $\frac{\partial r_i^*}{\partial \beta_i}$  from this expression into (C4) and after a couple of iterations of

rearranging terms we can observe the following equivalence:

$$\frac{\partial E[\pi_i^{I^*}]}{\partial \beta_i} > 0 \quad \text{iff} \quad -\frac{1}{2} \frac{(\alpha + \beta_i)(2\alpha + r_i^*) r_i^*}{(r_i^*)^3 + 3(r_i^*)^2 + 3\alpha^2 r_i^* + \alpha^2(\alpha + \beta_i)} > 0.$$

However, the later inequality is impossible, since  $\alpha, \beta_i, r_i^* \geq 0$ . Hence

$$\frac{\partial E[\pi_i^{I^*}]}{\partial \beta_i} < 0 \quad \forall \beta_i \geq 0. \quad Q.E.D.$$

**Proof of Proposition A1.**

Taking the partial derivative of (6) with respect to  $g_n$  and setting it to zero, we have

$$\frac{\partial E[\Pi_C^I(\beta_1, \dots, \beta_n)]}{\partial g_n} = \left\{ \frac{\alpha k_n}{\alpha + \beta_n} \left[ \beta_n \left( 1 + \frac{1}{(g_n)^2} - 2g_n \right) + \alpha \left( \frac{2}{(g_n)^3} - \frac{1}{(g_n)^2} - 1 \right) \right] - Q \right\} \prod_{j=1}^{n-1} (1 - g_j) = 0,$$

implying that

$$\beta_n \left( 1 + \frac{1}{(g_n)^2} - 2g_n \right) + \alpha \left( \frac{2}{(g_n)^3} - \frac{1}{(g_n)^2} - 1 \right) - \frac{Q(\alpha + \beta_n)}{\alpha k_n} = 0. \quad (C5)$$

We denote the left-hand-side of (C5) as LHS. From (C5)  $\lim_{g_n \rightarrow 0} \text{LHS} = \infty > 0$   
 $\text{LHS}_{(g_n=1)} = -\frac{Q(\alpha + \beta_n)}{\alpha k_n} < 0$ , and LHS is strictly decreasing in  $g_n$ . We can conclude that

$E[\Pi_C^I(\beta_1, \dots, \beta_n)]$  is concave in  $g_n$  and that there exists a unique optimal solution  $\hat{g}_n$  that maximizes the Client's expect profit. Note that  $\hat{g}_n$  does not depend on  $g_i$  for any  $i < n$ .

Next, we use strong induction to show that  $E[\Pi_C^I(\beta_1, \dots, \beta_n)]$  is concave in  $g_i$ , with a unique optimal solution  $\hat{g}_i$  for all  $i$ , where  $\hat{g}_i$  depends only on  $g_j$  for  $j > i$ . This characteristic implies that we are able to decompose the Client's problem into  $n$  sub-problems and solve them in reverse order  $j=n, \dots, 1$ . The base case, where  $E[\Pi_C^I(\beta_1, \dots, \beta_n)]$  is concave in  $g_n$  with a unique optimal solution  $\hat{g}_n$ , has already been proven. For the induction step, we assume that  $E[\Pi_C^I(\beta_1, \dots, \beta_n)]$  is concave in  $g_j$  for all  $j > i$ , with unique optimal solutions  $\hat{g}_j$ ; furthermore  $\hat{g}_j$  does not depend on  $g_k$ , for  $k \leq i$  and we set  $g_j = \hat{g}_j$  for  $j \geq i+1$ . We then show that  $E[\Pi_C^I(\beta_1, \dots, \beta_n)]$  is concave in  $g_i$  with a unique optimal solution  $\hat{g}_i$ . Take the derivative of  $E[\Pi_C^I(\beta_1, \dots, \beta_n)]$  with respect to  $g_i$ , and letting it equal zero, we have (for  $i < n$ ):

$$\begin{aligned} \frac{\partial E[\Pi_C^I(\beta_1, \dots, \beta_n)]}{\partial g_i} &= \frac{\alpha k_i}{\alpha + \beta_i} \left[ \beta_i \left( 1 + \frac{1}{(g_i)^2} - 2(g_i) \right) + \alpha \left( \frac{2}{(g_i)^3} - \frac{1}{(g_i)^2} - 1 \right) \right] \\ &\quad - \underbrace{Q \prod_{j=i+1}^n (1 - \hat{g}_j) + \sum_{m=i+1}^n \frac{\alpha k_m}{\alpha + \beta_m} (1 - \hat{g}_m)^2 \left( \frac{1}{\hat{g}_m} + 1 \right) \left( \frac{\alpha}{\hat{g}_m} + \beta_m \right) \prod_{j=i+1}^{m-1} (1 - \hat{g}_j)}_{f(\hat{g}_{i+1}, \dots, \hat{g}_n)} = 0. \end{aligned} \tag{C6}$$

Here we invoke the inductive hypothesis: at the optimal  $\hat{g}_{i+1}$ , we have that

$$\frac{\partial E[\Pi_C^I(\beta_1, \dots, \beta_n)]}{\partial g_{i+1}} = 0. \text{ Multiplying this equality (Equation (C6) with } i \text{ replaced by } i+1)$$

by  $(1 - \hat{g}_{i+1})$ , we have

$$\begin{aligned} \frac{\alpha k_{i+1}}{\alpha + \beta_{i+1}} (1 - \hat{g}_{i+1}) &\left[ \beta_{i+1} \left( 1 + \frac{1}{(\hat{g}_{i+1})^2} - 2\hat{g}_{i+1} \right) + \alpha \left( \frac{2}{(\hat{g}_{i+1})^3} - \frac{1}{(\hat{g}_{i+1})^2} - 1 \right) \right] \\ &- Q \prod_{j=i+1}^n (1 - \hat{g}_j) + \sum_{m=i+2}^n \frac{\alpha k_m}{\alpha + \beta_m} (1 - \hat{g}_m)^2 \left( \frac{1}{\hat{g}_m} + 1 \right) \left( \frac{\alpha}{\hat{g}_m} + \beta_m \right) \prod_{j=i+1}^{m-1} (1 - \hat{g}_j) = 0 \end{aligned} \tag{C7}$$

Denote the left-hand-side of (C7) as LHS2; note that LHS2 = 0. Let  $f(\hat{g}_{i+1}, \dots, \hat{g}_n)$

denote the constant

$$\left\{ -Q \prod_{j=i+1}^n (1 - \hat{g}_j) + \sum_{m=i+1}^n \frac{\alpha k_m}{\alpha + \beta_m} (1 - \hat{g}_m)^2 \left( \frac{1}{\hat{g}_m} + 1 \right) \left( \frac{\alpha}{\hat{g}_m} + \beta_m \right) \prod_{j=i+1}^{m-1} (1 - \hat{g}_j) \right\} \text{ in Equation (C6).}$$

Subtracting  $f(\hat{g}_{i+1}, \dots, \hat{g}_n)$  from LHS2, we get the result that

$$\frac{\beta_{i+1}(\hat{g}_{i+1}^2 + 1)(1 - \hat{g}_{i+1})}{\hat{g}_{i+1}^2} + \frac{2\alpha(1 - \hat{g}_{i+1})}{\hat{g}_{i+1}^3} > 0.$$

Since LHS2 = 0 and the difference of LHS2 and  $f(\hat{g}_{i+1}, \dots, \hat{g}_n)$  is positive, we can infer

that

$$-Q \prod_{j=i+1}^n (1 - \hat{g}_j) + \sum_{m=i+1}^n \frac{\alpha k_m}{\alpha + \beta_m} (1 - \hat{g}_m)^2 \left( \frac{1}{\hat{g}_m} + 1 \right) \left( \frac{\alpha}{\hat{g}_m} + \beta_m \right) \prod_{j=i+1}^{m-1} (1 - \hat{g}_j) < 0.$$

Since  $\lim_{g_i \rightarrow 0} \frac{\partial E[\Pi_C^I(\beta_1, \dots, \beta_n)]}{\partial g_i} = \infty > 0$ ,  $\lim_{g_i \rightarrow 1} \frac{\partial E[\Pi_C^I(\beta_1, \dots, \beta_n)]}{\partial g_i} = f(\hat{g}_{i+1}, \dots, \hat{g}_n) < 0$  and

$\frac{\partial E[\Pi_C^I(\beta_1, \dots, \beta_n)]}{\partial g_i}$  is strictly decreasing in  $g_i$ , we can infer that  $E[\Pi_C^I(\beta_1, \dots, \beta_n)]$  is concave

in  $g_i$  with a unique optimal solution  $\hat{g}_i \forall i$ . Since  $g_i$  has a one-to-one correspondence with  $r_i$ ,  $E[\Pi_C^I(\beta_1, \dots, \beta_n)]$  has a set of unique optimal solutions  $r_1^*, \dots, r_n^*$ . *Q.E.D.*

### Proof of Proposition 3

The derivative of (6) with respect to  $\beta_i$  satisfies

$$\frac{\partial E[\Pi_C^I(\beta_1, \dots, \beta_n)]}{\partial \beta_i} = \frac{\alpha^2 k_i (1 - g_i)^3}{(\alpha + \beta_i)^2 g_i} \prod_{j=1}^{i-1} (1 - g_j) > 0.$$

This result implies that  $E[\Pi_C^I(\beta_1, \dots, \beta_n)]$  is increasing in  $\beta_i, \forall i$  and hence the profit function can be reduced to

$$E \left[ \lim_{\beta_1, \dots, \beta_n \rightarrow \infty} E[\Pi_C^I(\beta_1, \dots, \beta_n)] \right] = Q \prod_{j=1}^n (1 - g_j) - \sum_{m=1}^n \alpha k_m (1 - g_m)^2 \left( \frac{1}{g_m} + 1 \right) \prod_{j=1}^{m-1} (1 - g_j).$$

Then from (C6), the optimality condition for  $i = 1$  (with  $\beta_i \rightarrow \infty \forall i$ ), namely

$$\frac{\partial E \left[ \lim_{\beta_1, \dots, \beta_n \rightarrow \infty} E[\Pi_C^I(\beta_1, \dots, \beta_n)] \right]}{\partial g_1} = 0, \text{ is given by}$$

$$Q \prod_{j=2}^n (1 - \hat{g}_j) - \sum_{m=2}^n \alpha k_m (1 - \hat{g}_m)^2 \left( \frac{1}{\hat{g}_m} + 1 \right) \prod_{j=2}^{m-1} (1 - \hat{g}_j) = \alpha k_1 \left( 1 + \frac{1}{\hat{g}_1^2} - 2\hat{g}_1 \right).$$

Multiply both sides by  $(1 - \hat{g}_1)$  and then subtract  $\alpha k_1 (1 - \hat{g}_1)^2 \left( \frac{1}{\hat{g}_1} + 1 \right)$ , we have

$$\underbrace{Q \prod_{j=1}^n (1 - \hat{g}_j) - \sum_{m=1}^n \alpha k_m (1 - \hat{g}_m)^2 \left( \frac{1}{\hat{g}_m} + 1 \right) \prod_{j=1}^{m-1} (1 - \hat{g}_j)}_{E[\Pi_C^I(\hat{g}_1, \dots, \hat{g}_n)]} = \alpha k_1 (1 - \hat{g}_1)^2 \left( 1 + \frac{1}{\hat{g}_1^2} \right) > 0.$$

where the left-hand side of this equation is the optimized Client's profit. *Q.E.D.*

#### Proof of Proposition 4

From (C6), the optimality condition for  $i$  is given by

$$\begin{aligned} & \frac{\alpha k_i}{\alpha + \beta_i} \left[ \underbrace{\beta_i \left( 1 + \frac{1}{(g_i)^2} - 2(g_i) \right) + \alpha \left( \frac{2}{(g_i)^3} - \frac{1}{(g_i)^2} - 1 \right)}_{\text{strictly decreasing in } g_i} \right] \\ &= Q \prod_{j=i+1}^n (1 - \hat{g}_j) - \sum_{m=i+1}^n \frac{\alpha k_m}{\alpha + \beta_m} (1 - \hat{g}_m)^2 \left( \frac{1}{\hat{g}_m} + 1 \right) \left( \frac{\alpha}{\hat{g}_m} + \beta_m \right) \prod_{j=i+1}^{m-1} (1 - \hat{g}_j). \end{aligned}$$

Since

$$\frac{\partial \text{LHS}}{\partial \beta_i} = \frac{2\alpha^2 k_n (1 - \hat{g}_i) \left( (\hat{g}_i)^3 - 1 \right)}{(\alpha + \beta_i) (\hat{g}_i)^3} < 0, \text{ the LHS is strictly decreasing in } \beta_i, \text{ and the RHS is}$$

not affected by  $\beta_i$ ; hence  $r_i^*$  is increasing in  $\beta_i$ .

We next examine the influence of successors. Again, from (C6), the optimality condition for  $g_i$  is

$$\begin{aligned} & \frac{\alpha k_i}{\alpha + \beta_i} \left[ \underbrace{\beta_i \left( 1 + \frac{1}{(g_i)^2} - 2(g_i) \right) + \alpha \left( \frac{2}{(g_i)^3} - \frac{1}{(g_i)^2} - 1 \right)}_{\text{strictly decreasing in } g_i} \right] \\ &= Q \prod_{j=i+1}^n (1 - \hat{g}_j) - \sum_{m=i+1}^n \frac{\alpha k_m}{\alpha + \beta_m} (1 - \hat{g}_m)^2 \left( \frac{1}{\hat{g}_m} + 1 \right) \left( \frac{\alpha}{\hat{g}_m} + \beta_m \right) \prod_{k=i+1}^{m-1} (1 - \hat{g}_k). \end{aligned}$$

From (6), we can interpret the RHS as the expected profit of a reduced problem consisting of only subcontractors  $i+1$  to  $n$ . Hence we can denote the RHS as

$E[\Pi_C^I(\beta_{i+1}, \dots, \beta_n)]$ . From Proposition 3, we can conclude that the RHS is increasing in  $\beta_j$ ,  $\forall j = i+1, \dots, n$ , that is

$$\frac{\partial E[\Pi_C^I(\beta_{i+1}, \dots, \beta_n)]}{\partial \beta_j} = \frac{\alpha^2 k_j (1 - g_j)^3}{(\alpha + \beta_j)^2 g_j} \prod_{k=1}^{j-1} (1 - g_k) > 0, \quad \forall j = i+1, \dots, n.$$

Since the LHS is not affected by  $\beta_j, j = i+1, \dots, n$  and is strictly decreasing in  $g_i$ ,

decreasing  $\hat{g}_i$  increases  $r_i^*$ .

*Q.E.D.*

**Proof of Proposition 5.**

Given that  $E[\pi_i^F] = p_i \prod_{k=1}^i \frac{r_k}{\alpha + r_k} - \frac{K_i + k_i r_i^2}{\alpha + r_i} \prod_{j=1}^{i-1} \frac{r_j}{\alpha + r_j}$ ,

setting the first order condition (FOC) to zero and holding all values of  $r_l$  ( $l \neq i$ ) constant, we get

$$\frac{\partial E[\pi_i^F]}{\partial r_i} = \left( \frac{\alpha p_i - 2\alpha k_i r_i - k_i r_i^2 + K_i}{(\alpha + r_i)^2} \right) \prod_{j=1}^{i-1} \frac{r_j}{\alpha + r_j} = 0,$$

implying that the optimal work rate for subcontractor  $i$  is equal to

$$r_i^* = \sqrt{\alpha^2 + \frac{p_i \alpha + K_i}{k_i}} - \alpha.$$

The second order condition (SOC) confirms that this maximizes  $E[\pi_i^F]$ ; that is,

$$\frac{\partial^2 E[\pi_i^F]}{\partial r_i^2} = -\frac{2\alpha(p_i + \alpha k_i + K_i)}{(\alpha + r_i)^3} \prod_{j=1}^{i-1} \frac{r_j}{\alpha + r_j} < 0.$$

*Q.E.D.*

**Proof of Proposition 6.**

From (1) and (8), we have,

$$E[\pi_i^I] = E \left[ e^{-\alpha \sum_{j=1}^{i-1} t_j} \right] \times E \left[ \left( p_i e^{-\beta t_i} \right) e^{-\alpha t_i} - \int_0^{t_i} (K_i + k_i r_i^2) e^{-\alpha t} dt \right].$$

and

$$E[\pi_i^D] = E \left[ e^{-\alpha \sum_{j=1}^{i-1} t_j} \right] \times E \left[ \left( p_i e^{-\beta t_i} \right) e^{-\alpha t_i} - \int_0^{t_i} (K_i + k_i r_i^2) e^{-\alpha t} dt \right].$$

Letting  $p_i' = p_i E \left[ e^{-\alpha \sum_{j=i+1}^n t_j} \right]$ , then  $E[\Pi_C^I] = E \left[ Q e^{-\alpha T} - \sum_{i=1}^n (p_i' e^{-\beta t_i}) e^{-\alpha \sum_{j=1}^i t_j} \right]$ , that is

equivalent to the expected client's profit under contract I as defined by (3). Since,  $E[\Pi_C^D] = E[\Pi_C^I]$  and  $E[\pi_i^D] = E[\pi_i^I] \quad \forall i$ , we can conclude that the equilibrium solutions of  $p_i$  and  $p_i'$   $\forall i$  are also equivalent. Therefore, the equilibrium work rates for all subcontractors are equal under the two contracts.

*Q.E.D.*
